# Supplementary material for: Differential effects of MoO3 and MoO2 sacrificial layers on the J–V performance of Cu2ZnSn(S,Se)4 solar cells
Source: Royal Society of Chemistry journal article supplement (doi:10.1039/d3se01409f), 2023-12-14
Supplement: d3se01409f1.pdf [file d3se01409f1.pdf]

## Supplementary Information

### Differential effects of MoO<sub>3</sub> and MoO<sub>2</sub> sacrificial layer on J-V performance of Cu<sub>2</sub>ZnSn (S, Se)<sub>4</sub> solar cells

Jinhui Zhang, †<sup>a</sup> Chuanhe Ma, †<sup>a</sup> Haixuan Gao<sup>a</sup>, Jinchun Jiang<sup>b</sup> and Hailong Wang<sup>\*a</sup>

<sup>a</sup>School of Physics and Physical Engineering, Qufu Normal University, Qufu 273165, China.

<sup>b</sup>Key Laboratory of Polar Materials and Devices (MOE), Department of Electronic science, East China Normal University, Shanghai 200241, China

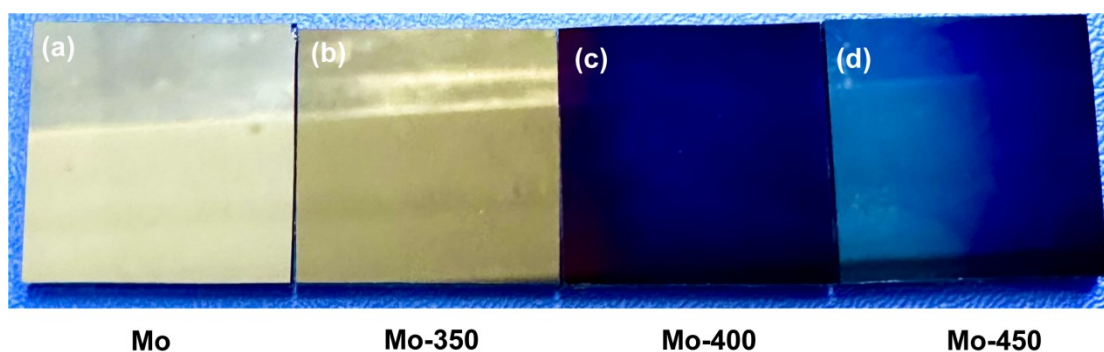

**Figure S1.** The macroscopic morphology of Mo substrate after oxidation annealing in air at different temperatures: (a) without annealing; (b) 350 °C; (c) 400 °C; (d) 450 °C.

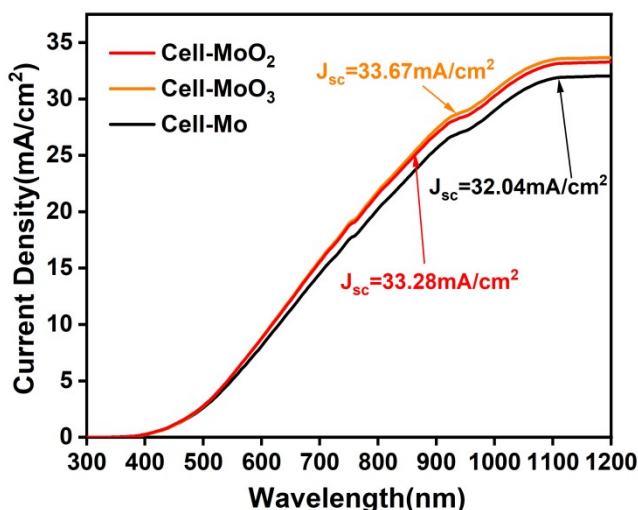

**Figure S2.** Integrated current density ( $J_{in}$ ) of different solar cell devices that fit based on AM1.5G spectral: Cell-Mo, Cell-MoO<sub>3</sub>, Cell-MoO<sub>2</sub>.

\* Corresponding author; E-mail: [hlwang@qfnu.edu.cn](mailto:hlwang@qfnu.edu.cn), Fax: +86 0537-4456092.

† First author: they contribute to this work equally.

Based on the AM1.5G spectrum, we fitted different solar cell devices' integrated current density ( $J_{\text{int}}$ ), as shown in Figure S2. The  $J_{\text{SC}}$  values of Cell Mo, Cell-MoO<sub>3</sub>, and Cell-MoO<sub>2</sub> calculated based on the EQE spectrum are 32.04 mA/cm<sup>2</sup>, 33.28 mA/cm<sup>2</sup>, and 33.67 mA/cm<sup>2</sup>, respectively, which is consistent with the  $J_{\text{SC}}$  obtained from the J-V curves. This indicates that the main reason for improving PCE by the sacrificial layer of MoO<sub>3</sub> is to increase  $J_{\text{sc}}$ .

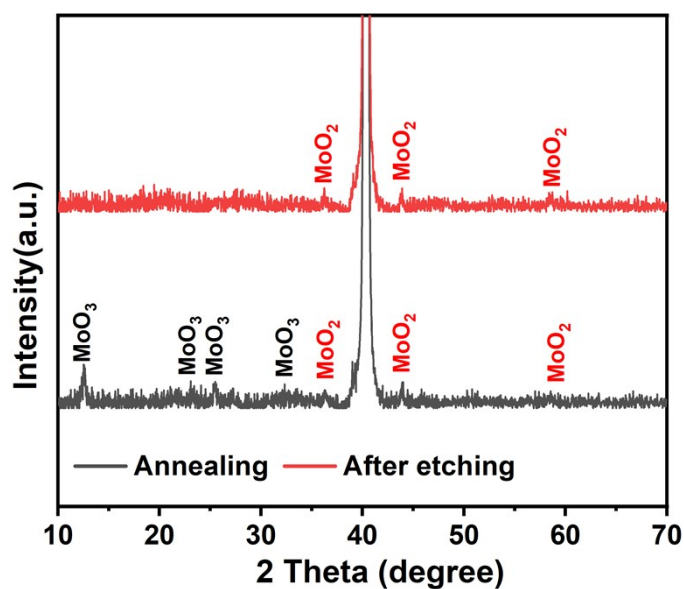

**Figure S3.** XRD patterns of Mo substrate by oxidation annealing at 450°C and after ammonia etching.

To observe the characteristic peaks related to MoO<sub>2</sub> and MoO<sub>3</sub>, we increased the oxidation annealing temperature from 350 °C to 450 °C to increase the thickness of the sacrificial layer and tested its XRD and Raman characteristics. As shown in Figure S3, the samples annealed at 450 °C exhibit XRD peaks related to MoO<sub>3</sub> at 12.5°, 23°, 25.4°, and 32.3°, and XRD peaks related to MoO<sub>2</sub> at 36.2°, 43.9°, and 58.4°. After ammonia etching, the XRD peaks related to MoO<sub>3</sub> disappear, leaving only the XRD peaks related to MoO<sub>2</sub>.

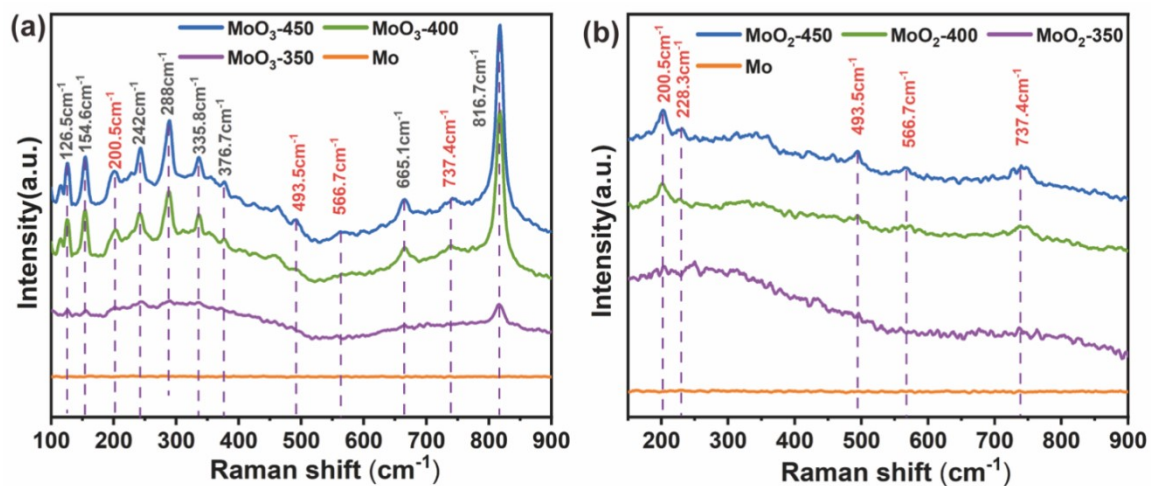

**Figure S4.** (a) Raman spectra of Mo substrates after increasing the oxidation annealing temperature to 350 °C, 400 °C, and 450 °C; (b) Raman spectra of the corresponding Mo substrates after ammonia etching.

In addition, we also investigated the effects of 450 °C oxidation annealing and ammonia etching on the Raman characteristic peaks related to MoO<sub>2</sub> and MoO<sub>3</sub>. As shown in Figure S4, the samples annealed at 450 °C exhibit Raman peaks associated with MoO<sub>3</sub> at 126.5cm<sup>-1</sup>, 154.6cm<sup>-1</sup>, 242cm<sup>-1</sup>, 288cm<sup>-1</sup>, 335.8cm<sup>-1</sup>, 376.7cm<sup>-1</sup>, and 665.1cm<sup>-1</sup>, and Raman peaks associated with MoO<sub>2</sub> at 200.5cm<sup>-1</sup>, 228.3cm<sup>-1</sup>, 493.5cm<sup>-1</sup>, 566.7cm<sup>-1</sup> and 737.4cm<sup>-1</sup>. After ammonia etching, the Raman peaks associated with MoO<sub>3</sub> disappear, leaving only the Raman peaks related to MoO<sub>2</sub>.

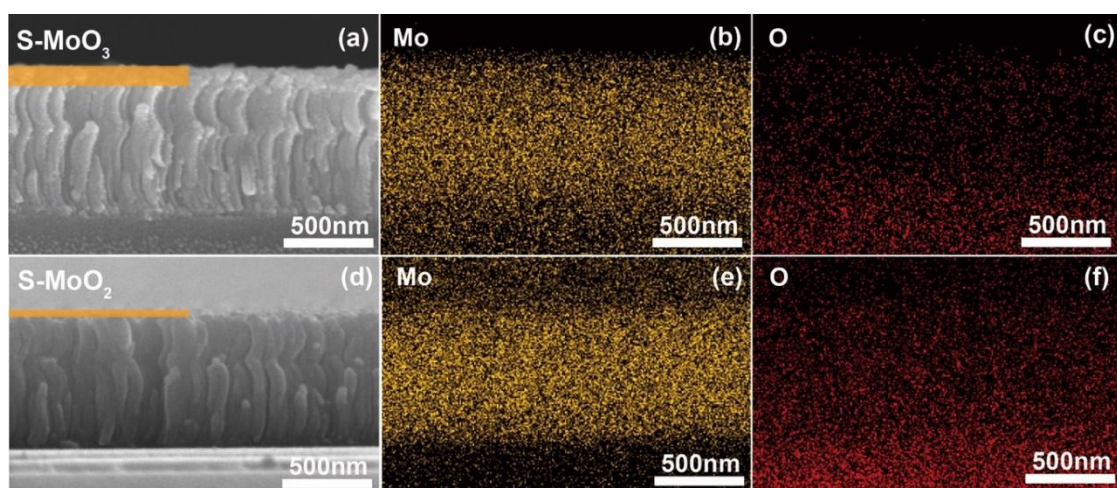

**Figure S5.** Cross-sectional SEM images and EDX element mappings of the substrate with MoO<sub>3</sub> (a-c) and substrate with MoO<sub>2</sub> (d-f). For the EDX element mappings, the color of the Mo element is golden, and the O element is red.

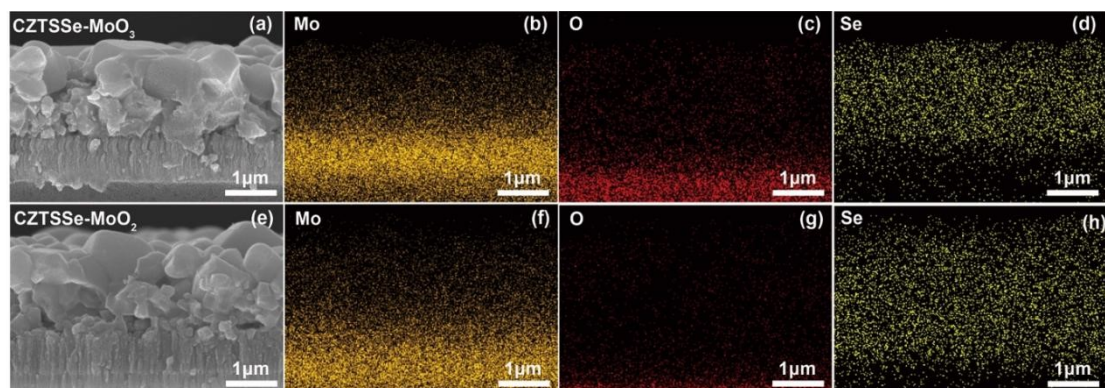

**Figure S6.** Cross-sectional SEM images and EDX element mappings of selenized CZTSSe films on  $\text{MoO}_3$  (a-d) and  $\text{MoO}_2$  (e-h) substrates. For the EDX element mappings, the color of the Mo element is golden, the O element is red, and the Se element is yellow.

Figure S5 shows the SEM cross-sectional and EDX element mappings of the substrate with  $\text{MoO}_3$  sacrificial layer (Fig. 5(a)-(c)) prepared by direct oxidation annealing at  $350^\circ\text{C}$  and substrate with  $\text{MoO}_2$  sacrificial layer (Fig. 5(d)-(f)) after ammonia etching, respectively. Figure S6 shows the cross-sectional SEM images and EDX element mappings of the CZTSSe films after selenide annealing of  $\text{MoO}_3$  substrate (Fig. 6(a)-(d)) and  $\text{MoO}_2$  substrate (Fig. 6(e)-(h)). For the EDX element mappings, the color of the Mo element is golden, the O element is red, and the Se element is yellow. The EDX element mapping shows that the O element (Figs. S5(c), S5(f)) diffuses into the Mo substrate after oxidation annealing. In contrast, the O signal in the substrate is significantly weakened after selenide annealing (Figs. S6(c), S6(g)). Se signals are enhanced at the location of the layers of  $\text{MoO}_3$  (Fig. S6(d)) and  $\text{MoO}_2$  (Fig. S6(h)), which proves that the  $\text{MoO}_x$  layers transform into  $\text{MoSe}_2$  layer after selenide annealing.

By comparing Figure S5 and S6, we can draw the following two conclusions. Firstly, selenide annealing weakens the oxygen signal within the substrate, while the selenium signal becomes stronger. This explains the meaning of the sacrificial layer, which means that  $\text{MoO}_x$  can only partially (not wholly) block the diffusion of Se elements into the Mo substrate, and  $\text{MoO}_x$  will eventually be replaced by  $\text{MoSe}_2$ . Secondly, the blocking effect of the  $\text{MoO}_3$  sacrificial layer is better than that of the  $\text{MoO}_2$  sacrificial layer, which can be demonstrated by

the thinner thickness of the MoSe<sub>2</sub> layer in Figure S6 (d) compared to Figure S6 (h).
